# Supplementary material for: The first general method for α-trifluoromethylation of carboxylic acids using BrF3
Source: Royal Society of Chemistry journal article supplement (doi:10.1039/b315705a), 2004-01-01
Supplement: b315705a.doc [file b315705a.doc]

**Supporting Information for:**

**The first general method for-trifluoromethylation of carboxylic acids using BrF3**

**Preparation and Handling of BrF3**. Although commercially available, we usually prepare our own BrF3 by passing 0.58 mol of fluorine through 0.2 mol of bromine placed in a copper reactor and cooled to 0-10 oC. The product can be stored in Teflon containers indefinitely. *BrF3 is a strong oxidizer and tends to react very exothermically with water and oxygenated organic solvents such as acetone or THF. Alkanes like petrol ether cannot serve as solvents either, since they react fast with BrF3. Any work using BrF3 should be conducted in a well ventilated area, and caution and common sense should be exercised.*

**General Procedure for the Preparation of 2-Carbomethoxy-1,1-bis(methylsulfide)-1-alkene Derivatives (2)** *(ref 12).* 10 mmol of an ester (**1**) was dissolved in 100 mL of dry THF and cooled to -78 oC. 12.5 mmol of LDA, (1.5M sol. in cyclohexane) was added and left to stir for two hours, cooled again to -78 oC and carbon disulfide (about 40 mmol) was added. The brown solution was stirred for another hour, cooled again to -78 oC, methyliodide (about 40 mmol) was added and stirred for additional two hours. The reaction mixture was warmed to room temperature, extracted with ether, dried over MgSO4 and the organic solvent evaporated. The product was isolated by flash chromatography as a brown oil with yields of 85 – 90%.

**General Procedure for the Preparation of Methyl 2-trifluoromethylesters (4) Through the Sulfonyl Derivatives (11).** The 2-Carbomethoxy-1,1-bis(methylsulfide)-1-alkene (**2**) (usually 1 mmol) was dissolved in 10-15 mL of dry CFCl3. About 2.5 mmol of BrF3 was dissolved in 10 mL of the same solvent, cooled to 0 oC, and added dropwise for 1 – 2 minutes to **2**. The reaction was quenched with saturated aqueous Na2SO3 and washed until colorless. The aqueous layer was extracted with CH2Cl2 and the organic layer was dried over MgSO4. The oily crude that contained mainly the difluoromethylsulfide **9** and the difluoromethylsulfoxide **10** derivatives, was dissolved in 15 mL of CHCl3 and oxidize with 3 fold excess of the HOF**.**CH3CN (*ref 17*) in 0 oC for 20 minutes. The reaction was terminated with NaHCO3 solution, extracted with CH2Cl2, and dried over MgSO4. After removing the solvent, the reaction mixture contained mainly the difluoromethylsulfonyl derivative (**11**) which, if desired could be isolated by flash chromatography. The crude **11** (300 mg) was dissolved in 15 mL of THF and 1.05 mol equiv of Bu4NF (1M solution in THF) was added at room temperature and stirred for 30 minutes (*ref 18*). Evaporation of the solvent followed by flash chromatography gave the desired -trifluoromethylesters (**4**) in 55-70% overall yields.

**2-Carbomethoxy-1,1-bis(methylsulfide)-1-hept-1-ene (2c)** IR 1718 cm-1; 1H NMR 3.72 (3 H, s), 2.72-2.50 (2 H, m), 2.26 (3 H, s), 2.24 (3 H, s), 0.90 ppm (3 H, t, *J* = 7 Hz); 13C NMR 168.8, 140.6, 137.9, 51.7, 33.0, 31.2, 28.0, 22.2, 17.5, 16.5, 13.8 ppm.

**2-Carbomethoxy-1,1- bis(methylsulfide)undec-1-ene** **(2d)** IR 1718 cm-1; 1H NMR 3.72 (3 H, s), 2.72-2.50 (2 H, m), 2.26 (3 H, s), 2.23 (3 H, s), 0.88 ppm (3 H, t, *J* = 7 Hz); C NMR 168.8, 140.7, 137.9, 51.6, 33.1, 31.7, 29.3, 29.2, 29.1, 29.0, 28.3, 22.5, 17.5, 16.5, 13.9 ppm.

**2-Carbomethoxy-1,1- bis(methylsulfide)tetradec-1-ene** **(2e)** IR 1718 cm-1; 1H NMR 3.78 (3 H, s), 2.74-2.52 (2 H, m), 2.32 (3 H, s), 2.30 (3 H, s), 0.89 ppm (3 H, t, *J* = 7 Hz); 13C NMR 169.0, 140.8, 137.9, 51.7, 33.2, 31.8, 29.6, 29.5, 29.4, 29.3, 29.2, 29.1 28.4, 22.6, 17.6, 16.6, 13.9 ppm.

**2-Carbomethoxy-3-cyclopentyl-1,1-bis(methylsulfide)prop-1-ene** **(2f)** IR 1715 cm-1; 1H NMR 3.77 (3 H, s), 2.62 (2 H, d, *J* = 7 Hz), 2.31 (3 H, s), 2.29 (3 H, s); 13C NMR 169.3, 141.1, 137.5, 51.8, 39.3, 38.8, 32.1, 24.8, 17.6, 16.5 ppm.

**2-Carbomethoxy-4-cyclohexyl-1,1-bis(methylsulfide)but-1-ene** **(2g)** IR 1718 cm-1; 1H NMR 3.74 (3 H, s), 2.72-2.50 (2 H, m), 2.25 (3 H, s), 2.24 (3 H, s); 13C NMR 168.8, 140.9, 137.7, 51.7, 37.3, 35.8, 33.0, 30.7, 26.5, 26.1, 17.5, 16.5 ppm.

**2-Carbomethoxy-5-chloro-1,1-bis(methylsulfide)pent-1-ene** **(2h)** IR 1717 cm-1; 1H NMR 3.79 (3 H, s), 3.54 (2 H, t, *J* = 7 Hz), 2.78-2.51 (2 H, m), 2.36 (3 H, s), 2.32 ppm (3 H, s); 13C NMR 170.3, 143.0, 139.7, 53.9, 43.0, 33.4, 32.5, 19.6, 18.8 ppm.

**2-Carboethoxy-4-ethoxy-1,1-bis(methylsulfide)but-1-ene** **(2i)** IR 1718 cm-1; 1H NMR 4.24 (2 H, q, *J* = 7 Hz), 3.53-3.40 (4 H, m), 2.95-2.85 (2 H, m), 2.33 (3 H, s), 2.31 (3 H, s), 1.32 (3 H, t, *J* = 7 Hz), 1.17 ppm (3 H, t, *J* = 7 Hz); 13C NMR 167.8, 141.4, 136.2, 68.5, 66.0, 60.8, 33.7, 17.6, 16.9, 15.0, 14.0 ppm.

**2-Carboethoxy-1,1-bis(methylsulfide)-6-pivaloyloxyhex-1-ene** **(2j)** IR 1719, 1730 cm-1; 1H NMR 4.24 (2 H, q, *J* = 7 Hz), 4.05 (2 H, t, *J* = 7 Hz), 2.62 (2 H, t, *J* = 7 Hz), 2.31 (3 H, s), 2.29 (3 H, s), 1.31 (3 H, t, *J* = 7 Hz), 1.18 ppm (9 H, s); 13C NMR 178.4, 168.2, 140.1, 138.6, 63.8, 60.8, 38.6, 32.6, 28.0, 27.0, 24.9, 17.5, 16.6, 14.0 ppm.

**2-Carbomethoxy-7-ethyleneacetal-1,1-bis(methylsulfide)oct-1-ene** **(2l)** was prepared by reacting **1k** with ethylene glycol in the presence of catalitic amount of *p*-TSA and azeotropic distillation of the water formed followed by a treatment with LDA, CS2 and MeI as described above. IR 1718 cm-1; 1H NMR 3.89 (4 H, s), 3.73 (3 H, s), 2.65-2.45 (2 H, m), 2.27 (3 H, s), 2.25 (3 H, s), 1.26 ppm (3 H, s); 13C NMR 168.8, 140.2, 138.5, 109.9, 64.5, 51.7, 38.7, 33.1, 28.6, 23.6, 17.5, 16.6 ppm.

**2-Carbomethoxy-1,1-bis(methylsulfide)oct-7-oxo-1-ene** **(2k)** was prepared by hydrolyzing first the ketal **2l** (2N HCl aqueous ether solution) at room temperature for two hours. IR 1714, 1718 cm-1; 1H NMR 3.76 (3 H, s), 2.62-2.54 (2 H, m), 2.42 (2 H, *t*, J = 7 Hz), 2.31 (3 H, s), 2.27 (3 H, s), 2.11 ppm (3 H, s); 13C NMR 208.7, 168.7, 139.7, 139.0, 51.8, 43.2, 32.8, 29.7, 27.9, 23.2, 20.9, 17.6, 16.6 ppm.

Since *method B* proved to be superior to *method A* we present only two examples of compounds **3**. The spectral data of all other compounds if this category are similar and all have the correct MS and microanalysis. **Butyl -bromo--trifluoromethyl--*t*-butylacetate** (**3b**) was prepared from **2b** in55% yield: oil; IR 1745 cm-1; 1H NMR 4.25 (2 H, t, *J* = 7 Hz), 1.72-1.69 (2 H, m), 1.47-1.42 (2 H, m), 1.29 (9 H, s), 0.96 ppm (3 H, t, *J* = 7 Hz); 19F NMR –62.0 ppm (s); 13C NMR 164.7, 124 (q, *J* = 282 Hz), 74.1 (q, *J* = 25 Hz), 67.0, 38.8, 30.2, 28.0, 19.0, 13.5 ppm; MS (CI) *m/z* 319 and 321, both (MH)+. **Methyl 2-bromo-2-trifluoromethylheptanoate (3c)** was prepared from **2c** in50% yield: oil; IR 1751 cm-1; 1H NMR 3.87 (3 H, s), 2.31-2.11 (2 H, m), 0.90 ppm (3 H, t, *J* = 7 Hz); 19F NMR -70.8 ppm (s); 13C NMR 165.2, 123.6 (q, *J* = 280 Hz), 61.9 (q, *J* = 29 Hz), 53.9, 36.1, 31.3, 25.1, 22.0, 13.7 ppm; MS (CI) *m/z* 291 and 293, both (MH)+. Anal. Calcd for C9H14BrF3O2: C, 37.13; H, 4.85; Br, 27.45; F, 19.58. Found: C, 37.40; H, 4.80; Br, 27.78; F, 19.91.

Although the corresponding sulfides **9** and sulfoxides **10** were reacted as a mixture with the oxidizing agent HOF•CH3CN they could be isolated by column chromatography, if so desired. The spectral properties of **9g** and **10g** are typical: **9g**: oil; IR 1745 cm-1; 1H NMR 3.83 (3 H, s), 2.34 ppm (3 H, s); 19F NMRF, d, *J* = 204 Hz),  ppmF, d, *J* = 204 Hz); 13C NMR 166.1, 131.6 (t, *J* = 290 Hz), 70.4 (t, *J* = 23 Hz), 54.1, 10.9 ppm; MS (CI) *m/z* 359 and 361, both (MH)+. (**10g**) as two diastereoisomers: oil; IR 1748 and 1755 cm-1; 1H NMR 3.86 and 3.84 (3 H, s), 2.76 and 2.75 ppm (3 H, t, *J* = 2 Hz); 19F NMR5 and –99.7 F, dm, *J* = 215 Hz),  and –112.7 ppmF, dm, *J* = 215 Hz); 13C NMR 165.6 and 165.4, 122.5 and 122.4 (t, *J* = 308 Hz), 67.6 and 65.8 (t, *J* = 20 Hz), 54.1 and 54.0 ppm; MS (CI) *m/z* 375 and 377, both (MH)+.

**Methyl 2-bromo-2-[difluoro(methylsulfonyl)methyl]heptanoate** **(11c)** was prepared from **2c** as described above: oil; IR 1741 cm-1; 1H NMR 3.85 (3 H, s), 3.14 (3 H, t, *J* = 2 Hz), 0.90 ppm (3 H, t, *J* = 7 Hz); 19F NMRF, dm, *J* = 230 Hz),  ppmF, dm, *J* = 230 Hz); 13C NMR 165.0, 119.5 (t, *J* = 300 Hz), 63.6 (t, *J* = 19 Hz), 54.1, 38.3, 35.4, 31.2, 25.1, 22.2, 13.8 ppm; MS (CI) *m/z* 351 and 353, both (MH)+.

**Methyl 2-bromo-2-[difluoro(methylsulfonyl)methyl]undecanoate** **(11d)** was prepared from **2d** as described above: oil; IR 1745 cm-1; 1H NMR 3.85 (3 H, s), 3.14 (3 H, t, *J* = 2 Hz), 0.90 ppm (3 H, t, *J* = 7 Hz); 19F NMRF, dm, *J* = 230 Hz),  ppmF, dm, *J* = 230 Hz); 13C NMR 165.0, 119.6 (t, *J* = 300 Hz), 63.6 (t, *J* = 19 Hz), 54.1, 38.3, 35.5, 31.7, 29.3, 29.2, 29.1, 29.0, 25.5, 22.5, 14.0 ppm; MS (CI) *m/z* 407 and 409, both (MH)+.

**Methyl 2-bromo-2-[difluoro(methylsulfonyl)methyl]tetradecanoate** **(11e)** was prepared from **2e** as described above: oil; IR 1745 cm-1; 1H NMR 3.84 (3 H, s), 3.12 (3 H, t, *J* = 2 Hz), 0.90 ppm (3 H, t, *J* = 7 Hz); 19F NMRF, dm, *J* = 230 Hz),  ppmF, dm, *J* = 230 Hz); 13C NMR 165.0, 119.6 (t, *J* = 300 Hz), 63.6 (t, *J* = 19 Hz), 54.1, 38.3, 35.4, 31.8, 29.6, 29.5, 29.4, 29.3, 29.2, 29.1, 25.5, 22.5, 14.0 ppm; HRMS (CI) (*m/z)* calcd forC17H32BrF2O4S 449.1172 (MH)+, found: 449.1165.

**Methyl 2-bromo-3-cyclopentyl-2-[difluoro(methylsulfonyl)methyl]propanoate** **(11f)** was prepared from **2f** as described above: oil; IR 1745 cm-1; 1H NMR 3.85 (3 H, s), 3.14 (3 H, t, *J* = 2 Hz), 2.58 (1 H, dd, *J1* = 15 Hz, *J2* = 7 Hz), 2.33 ppm (1 H, dd, *J1* = 15 Hz, *J2* = 5 Hz); 19F NMRF, dm, *J* = 230 Hz),  ppmF, dm, *J* = 230 Hz); 13C NMR 165.1, 119.7 (t, *J* = 300 Hz), 64.0 (t, *J* = 20 Hz), 54.1, 41.0, 38.7, 37.3, 34.2, 32.4, 24.9, 24.3 ppm; MS (CI) *m/z* 363 and 365, both (MH)+.

**Methyl 2-bromo-4-cyclohexyl-2-[difluoro(methylsulfonyl)methyl]butanoate** **(11g)** was prepared from **2g** as described above: oil; IR 1745 cm-1; 1H NMR 3.88 (3 H, s), 3.15 ppm (3 H, t, *J* = 2 Hz); 19F NMRF, dm, *J* = 230 Hz),  ppmF, dm, *J* = 230 Hz); 13C NMR 166.9, 121.7 (t, *J* = 300 Hz), 66.0 (t, *J* = 19 Hz), 56.1, 40.3, 39.4, 35.3, 35.0, 34.9, 34.8, 28.4, 28.1, 28.0 ppm; MS (CI) *m/z* 391 and 393, both (MH)+.

**Methyl 2-bromo-5-chloro-2-[difluoro(methylsulfonyl)methyl]pentanoate** **(11h)** was prepared from **2h** as described above: oil; IR 1747 cm-1; 1H NMR 3.85 (3 H, s), 3.58 (2 H, t, *J* = 7 Hz), 3.14 ppm (3 H, t, *J* = 2 Hz); 19F NMRF, dm, *J* = 230 Hz),  ppm F, dm, *J* = 230 Hz); 13C NMR 164.6, 119.2 (t, *J* = 300 Hz), 63.0 (t, *J* = 19 Hz), 54.2, 42.7, 38.0, 32.9, 28.8 ppm; MS (CI) *m/z* 357 and 359, both (MH)+.

**Ethyl 2-bromo-4-ethoxy-2-[difluoro(methylsulfonyl)methyl]butanoate** **(11i)** was prepared from **2i** as described above: oil; IR 1741 cm-1; 1H NMR 4.29 (2 H, q, *J* = 7 Hz), 3.14 (3 H, t, *J* = 2 Hz), 1.32 (3 H, t, *J* = 7 Hz), 1.17 ppm (3 H, t, *J* = 7 Hz); 19F NMRF, dm, *J* = 230 Hz),  ppmF, dm, *J* = 230 Hz); 13C NMR 163.9, 119.5 (t, *J* = 300 Hz), 66.4, 66.2, 63.6, 62.1 (t, *J* = 19 Hz), 38.5, 35.2, 14.8, 13.4 ppm; MS (CI) *m/z* 367 and 369, both (MH)+.

**Ethyl 2-bromo-2-[difluoro(methylsulfonyl)methyl]-6-pivaloyloxyhexanoate** **(11j)** was prepared from **2j** as described above: oil; IR 1727, 1740 cm-1; 1H NMR 4.29 (2 H, q, *J* = 7 Hz), 4.07 (2 H, t, *J* = 7 Hz), 3.14 (3 H, t, *J* = 2 Hz), 1.33 (3 H, t, *J* = 7 Hz), 1.19 ppm (9 H, s); 19F NMRF, dm, *J* = 230 Hz),  ppmF, dm, *J* = 230 Hz); 13C NMR 178.4, 164.3, 119.6 (t, *J* = 300 Hz), 63.8, 63.6, 63.5 (t, *J* = 19 Hz), 38.6, 38.4, 35.1, 28.2, 27.0, 22.4, 13.6 ppm; MS (CI) *m/z* 451 and 453, both (MH)+.

**Methyl 2-bromo-2-[difluoro(methylsulfonyl)methyl]-7-oxooctanoate** **(11k)** was prepared from **2k** as described above: oil; IR 1716, 1747 cm-1; 1H NMR 3.85 (3 H, s), 3.14 (3 H, t, *J* = 2 Hz), 2.48 (3 H, t, *J* = 7 Hz), 2.15 ppm (3 H, s); 19F NMRF, dm, *J* = 230 Hz),  ppmF, dm, *J* = 230 Hz); 13C NMR 208.0, 164.7, 119.3 (t, *J* = 300 Hz), 63.0 (t, *J* = 19 Hz), 54.4, 42.6, 38.1, 35.0, 29.7, 25.0, 23.0 ppm; MS (CI) *m/z* 379 and 381, both (MH)+.

**Butyl 2**-**trifluoromethyl-2-t-butylacetate (4b)** IR 1739 cm-1; 1H NMR 4.17 (2 H, t, *J* = 7 Hz) 3.02 (1 H, q, *J* = 9 Hz), 1.69-1.62 (2 H, m), 1.46-1.39 (2 H, m), 1.14 (9 H, s), 0.92 ppm (3 H, t, *J* = 7 Hz); 19F NMR 6 ppmd, *J* = 9 Hz); 13C NMR 167.2, 125.1 (q, *J* = 282 Hz), 65.1, 59.3 (q, *J* = 25 Hz), 32.8, 30.4, 28.5, 19.0, 13.5 ppm; HRMS (CI) (*m/z)* calcd for C11H19F3O2 241.1415 (MH)+, found: 241.1406. Anal. Calcd. for C11H19F3O2: C, 54.99; H, 7.97; Found: C, 54.71; H, 7.88.

**Methyl 2-trifluoromethylheptanoate** **(4c)** (*ref 19*).IR 1747 cm-1; 1H NMR 3.79 (3 H, s), 3.22-3.05 (1 H, m), 0.90 ppm (3 H, t, *J* = 7 Hz); 19F NMR ppm (d, *J* = 8 Hz); 13C NMR 168.1, 124.5 (q, *J* = 280 Hz), 52.4, 50.2 (q, *J* = 28 Hz), 31.1, 29.5, 29.3, 22.1, 13.8 ppm; HRMS (CI) (*m/z)* calcd for C9H16F3O2 213.1102 (MH)+, found: 213.1098.

**Methyl 2-trifluoromethylundecanoate** **(4d)** (*ref 20*). IR 1747 cm-1; 1H NMR 3.79 (3 H, s), 3.23-3.02 (1 H, m), 0.90 ppm (3 H, t, *J* = 7 Hz); 19F NMR ppm (d, *J* = 8 Hz); 13C NMR 168.1, 124.6 (q, *J* = 280 Hz), 52.4, 50.2 (q, *J* = 28 Hz), 31.7, 29.3, 29.2, 29.1, 29.0, 26.6, 26.0, 22.5, 13.9 ppm; HRMS (CI) (*m/z)* calcd for C13H24F3O2 269.1728 (MH)+, found: 269.1729.

**Methyl 2-trifluoromethyltetradecanoate** **(4e)** IR 1745 cm-1; 1H NMR 3.79 (3 H, s), 3.18-3.07 (1 H, m), 0.90 ppm (3 H, t, *J* = 7 Hz); 19F NMR ppm (d, *J* = 8 Hz); 13C NMR 170.1, 125.6 (q, *J* = 280 Hz), 54.4, 50.2 (q, *J* = 28 Hz), 33.7, 31.5, 31.4, 31.3, 31.2, 30.1, 31.0, 29.0, 26.6, 22.5, 13.9 ppm; HRMS (CI) (*m/z)* calcd for C16H30F3O2 311.2197 (MH)+, found: 311.2188. Anal. Calcd. for C16H29F3O2: C, 61.91; H, 9.42; F, 18.36. Found: C, 61.92; H, 9.40; F, 18.80.

**Methyl 3-cyclopentyl-2-trifluoromethylpropanoate** **(4f)** IR 1745 cm-1; 1H NMR 3.78 (3 H, s), 3.22-3.05 ppm (1 H, m); 19F NMR ppm (d, *J* = 8 Hz); 13C NMR 168.2, 124.7 (q, *J* = 280 Hz), 52.4, 49.8 (q, *J* = 28 Hz), 37.3, 32.6, 32.1, 31.8, 24.9, 24.8 ppm; HRMS (CI) (*m/z)* calcd for C10H16F3O2 225.1102 (MH)+, found: 225.1097. Anal. Calcd. for C10H15F3O2: C, 53.57; H, 6.74. Found: C, 52.77; H, 6.48.

**Methyl 4-cyclohexyl-2-trifluoromethylbutanoate** **(4g)** IR 1744 cm-1; 1H NMR 3.78 (3 H, s), 3.25-3.00 ppm (1 H, m); 19F NMR ppm (d, *J* = 8 Hz); 19C NMR 168.1, 124.6 (q, *J* = 280 Hz), 52.4, 50.3 (q, *J* = 28 Hz), 37.1, 34.2, 33.0, 32.7, 26.5, 26.0 ppm; HRMS (CI) (*m/z)* calcd for C12H20F3O2 253.1415 (MH)+, found: 253.1408. Anal. Calcd. for C12H19F3O2: C, 57.13; H, 7.59. Found: C, 57.01; H, 7.51.

**Methyl 5-chloro-2-trifluoromethylpentanoate (4h)** IR 1748 cm-1; 1H NMR 3.80 (3 H, s), 3.56 (2 H, t, *J* = 6 Hz), 3.25-3.01 ppm (1H, m); 19F NMR -68.7 ppm d, *J* = 8 Hz); 13C NMR 167.5, 124.3 (q, *J* = 280 Hz), 52.7, 49.4 (q, *J* = 28 Hz), 43.7, 29.4, 23.5 ppm; MS (CI) *m/z* 219 (MH)+. Anal. Calcd for C7H10ClF3O2: C, 38.46; H, 4.61; F ,26.07. Found: C, 38.63; H, 4.33; F, 25.80.

**Ethyl 4-ethoxy-2-trifluoromethylbutanoate** **(4i)** IR 1742 cm-1; 1H NMR 4.24 (2 H, q, *J* = 7 Hz), 3.53-3.10 (5 H, m), 2.35-2.05 (2 H, m), 1.30 (3 H, t, *J* = 7 Hz), 1.17 ppm (3 H, t, *J* = 7 Hz); 19F NMRppmd, *J* = 8 Hz); 13C NMR 167.4, 124.3 (q, *J* = 280 Hz), 66.7, 66.2, 61.6, 47.5 (q, *J* = 28 Hz), 26.4, 14.9, 13.9 ppm; HRMS (CI) (*m/z)* calcd for C9H16F3O3 229.1040 (MH)+, found: 229. 1048. Anal. Calcd for C9H15F3O3: C, 47.37; H, 6.63. Found: C, 47.44; H, 6.43.

**Ethyl 6-pivaloyloxy-2-trifluoromethylhexanoate** **(4j)** IR 1725, 1742 cm-1; 1H NMR 4.23 (2 H, q, *J* = 7 Hz), 4.07 (2 H, t, *J* = 7 Hz), 3.20-3.02 (1 H, m), 1.34 (3 H, t, *J* = 7 Hz), 1.20 ppm (9 H, s); 19F NMRppmd, *J* = 8 Hz); 13C NMR 178.2, 167.1, 124.6 (q, *J* = 280 Hz), 63.4, 61.4, 50.2 (q, *J* = 28 Hz), 38.4, 27.9, 26.8, 25.5, 23.5, 13.7 ppm; HRMS (CI) (*m/z)* calcd for C14H24F3O4 313.1626 (MH)+, found: 313.1624. Anal. Calcd for C14H23F3O4: C,53.84; H, 7.42; F,18.25. Found: C, 53.85; H, 7.47; F, 18.31.

**Methyl 7-oxo-2-trifluoromethyloctanoate** **(4k)** IR 1714, 1747 cm-1; 1H NMR 3.75 (3 H, s), 3.35-3.05 (1 H, m), 2.42 (2 H, t, *J* = 7 Hz), 2.10 ppm (3 H, s); 19F NMR ppm (d, *J* = 8 Hz); 13C NMR 208.2, 167.9, 124.3 (q, *J* = 280 Hz), 52.5, 50.0 (q, *J* = 28 Hz), 42.9, 29.8, 26.1, 25.8, 22.9 ppm; HRMS (CI) (*m/z)* calcd for C10H16F3O3 241.1051 (MH)+, found: 241.1045. Anal. Calcd for C10H15F3O3: C, 50.00; H, 6.29; F ,23.73. Found: C, 49.80; H, 6.30; F, 24.02.
